# Supplementary material for: Di-ionic multifunctional porous organic frameworks for efficient CO2 fixation under mild and co-catalyst free conditions
Source: Royal Society of Chemistry journal article supplement (doi:10.1039/c8gc01867g), 2018-01-01
Supplement: c8gc01867g1.pdf [file c8gc01867g1.pdf]

## Supporting Information

### **Di-ionic multifunctional porous organic frameworks for efficient CO<sub>2</sub> fixation under mild and co-catalyst free conditions**

**Dingxuan Ma,<sup>a</sup> Jixin Li,<sup>b</sup> Kang Liu,<sup>\*a</sup> Baiyan Li,<sup>b</sup> Chunguang Li<sup>b</sup> and Zhan Shi<sup>\*b</sup>**

<sup>a</sup> Laboratory of Eco-chemical Engineering, Ministry of Education, College of Chemistry and Molecular Engineering, Qingdao University of Science and Technology, Qingdao 266042, People's Republic of China.

<sup>b</sup> State Key Laboratory of Inorganic Synthesis and Preparative Chemistry, College of Chemistry, Jilin University, Changchun, 130012, People's Republic of China

E-mail: liukang82@126.com; zshi@mail.jlu.edu.cn

Editorial note: This supplementary information file associated with the manuscript DOI [doi.org/10.1039/C8GC01867G](https://doi.org/10.1039/C8GC01867G) replaces the version published on 18<sup>th</sup> September 2018. The previous version of this supplementary information contained incorrect SEM images for Figure S8. This revised supplementary information contains the correct SEM images in Figure S8.

## I Synthesis

### POF-Zn-X<sup>-</sup>

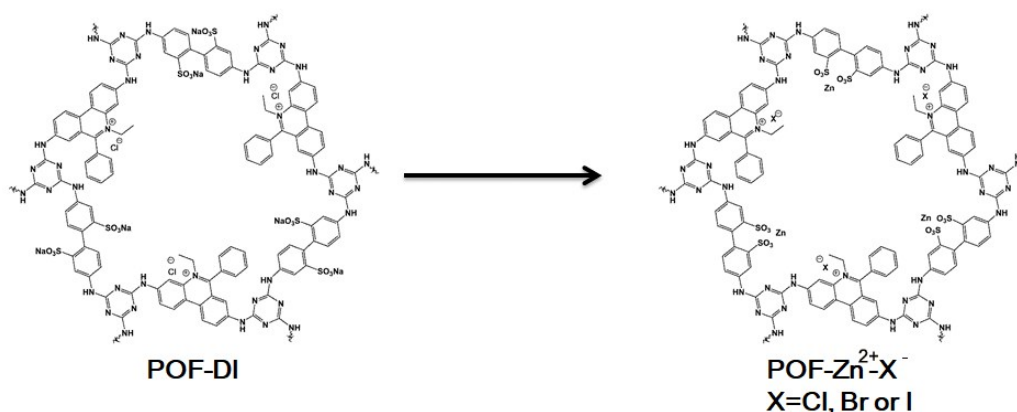

**Scheme S1** Ion exchange for the preparation of POF-Zn<sup>2+</sup>-X<sup>-</sup>.

Activated POF-DI (0.5 g) was dispersed in 20 mL of 0.2 M methanol solution of corresponding halide salts. After the mixture was stirred for 12 h, the residue was filtered. Repeated the above step three times, the precipitate was washed with anhydrous methanol (20 ml) five times and dried at 100 °C under vacuum to afford the goal product.

### POF-DI & ZnCl<sub>2</sub>

Activated POF-DI (150 mg) and ZnCl<sub>2</sub> (20 mg) were mixed uniformly, and then used as the catalyst.

## II Characterization Details

**Table S1** Elemental Analysis

| POF                                   | C%    | H%    | N%    | S%    | Na%   | Zn%  | S/Zn mole ratio |
|---------------------------------------|-------|-------|-------|-------|-------|------|-----------------|
| POF-DI                                | 52.72 | 4.872 | 16.90 | 5.709 | 5.74  | 0    | /               |
| POF-Zn <sup>2+</sup> -Cl <sup>-</sup> | 47.44 | 4.392 | 14.55 | 4.923 | 0.106 | 4.48 | 2.245           |
| POF-Zn <sup>2+</sup> -Br <sup>-</sup> | 46.74 | 4.302 | 14.38 | 4.607 | 0.143 | 4.23 | 2.226           |

|                                      |       |       |       |       |       |      |       |
|--------------------------------------|-------|-------|-------|-------|-------|------|-------|
| POF-Zn <sup>2+</sup> -I <sup>-</sup> | 46.33 | 4.221 | 14.22 | 4.564 | 0.117 | 4.04 | 2.309 |
|--------------------------------------|-------|-------|-------|-------|-------|------|-------|

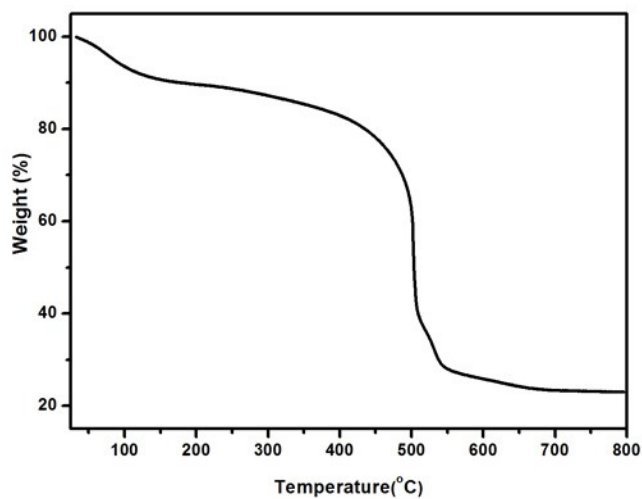

Fig. S1 TGA data of POF-DI.

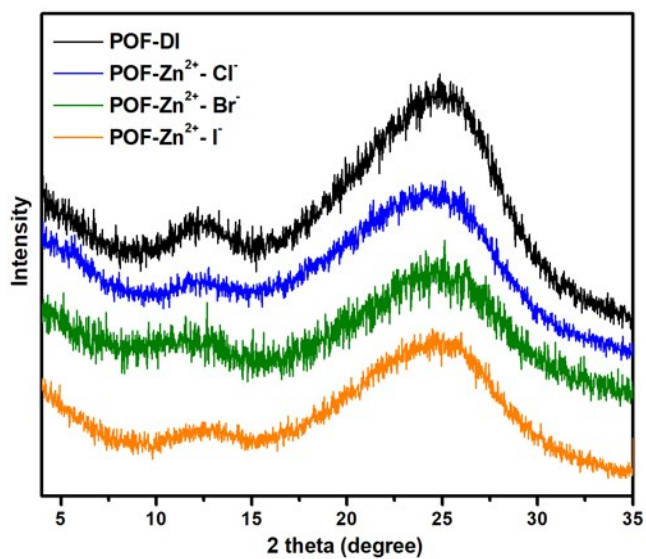

Fig. S2 PXRD patterns of POF-DI, POF-Zn<sup>2+</sup>-Cl<sup>-</sup>, POF-Zn<sup>2+</sup>-Br<sup>-</sup> and POF-Zn<sup>2+</sup>-I<sup>-</sup>.

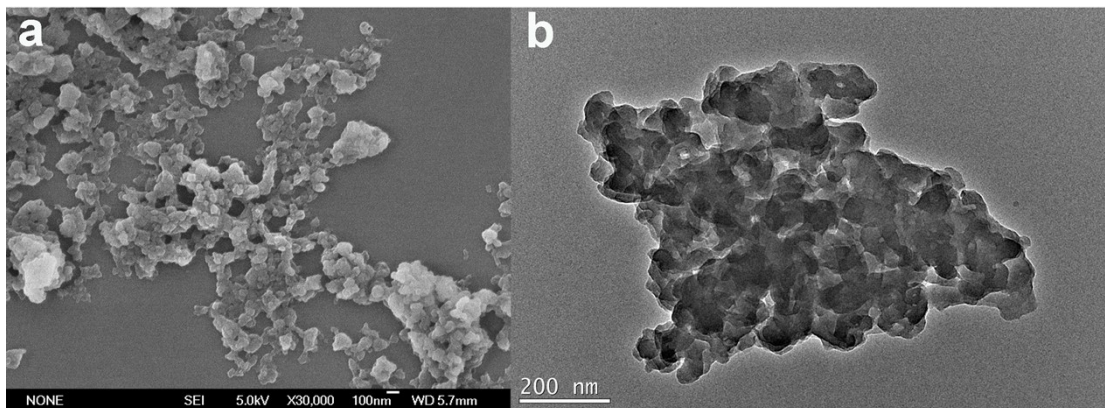

Fig. S3 SEM and TEM images of POF-DI.

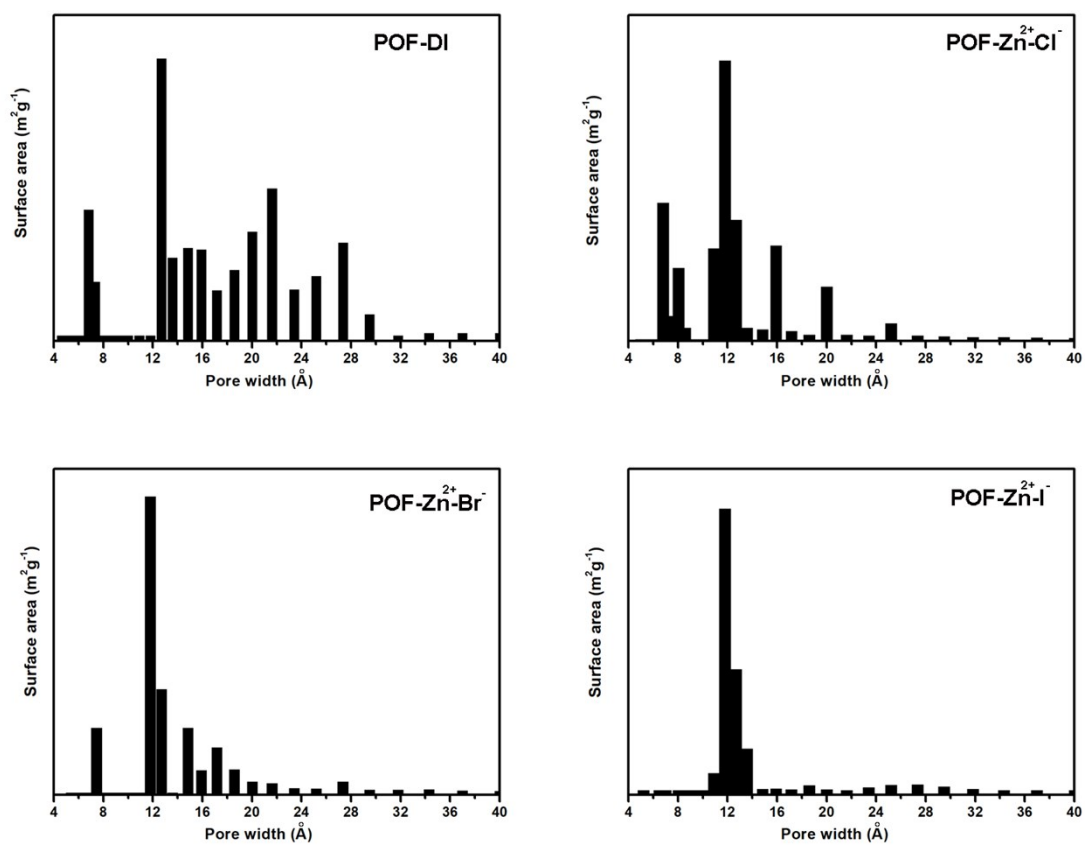

Fig. S4 Pore-size distribution profiles of POF-DI, POF-Zn<sup>2+</sup>-Cl<sup>-</sup>, POF-Zn<sup>2+</sup>-Br<sup>-</sup> and POF-Zn<sup>2+</sup>-I<sup>-</sup>.

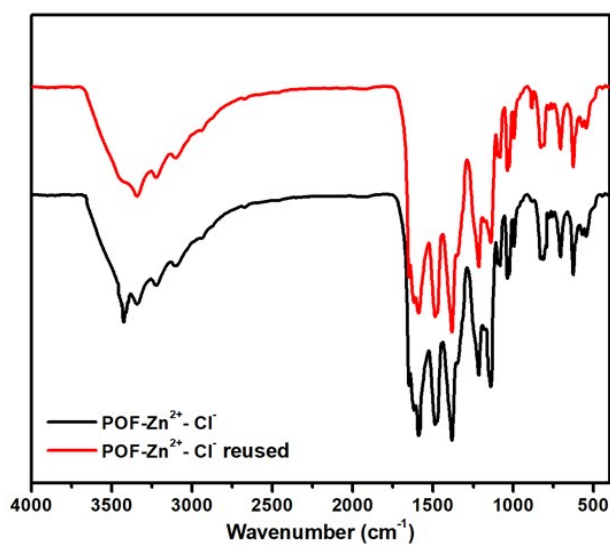

**Fig. S5** Comparison of IR spectra of the as-made POF-Zn<sup>2+</sup>-Cl<sup>-</sup> sample and the POF-Zn<sup>2+</sup>-Cl<sup>-</sup> after catalysis cycles.

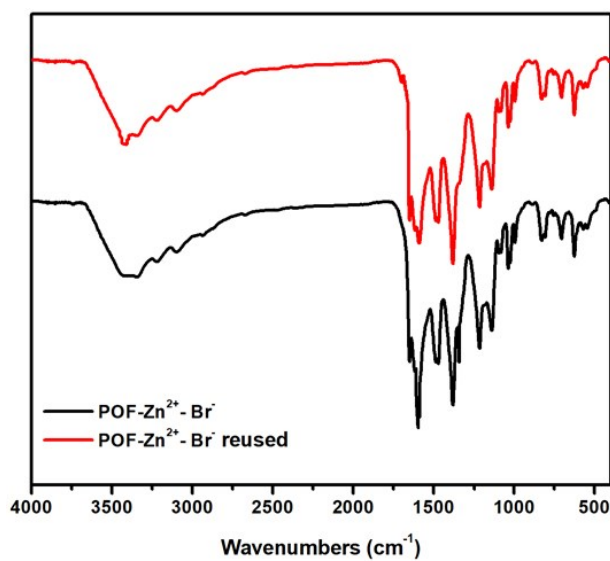

**Fig. S6** Comparison of IR spectra of the as-made POF-Zn<sup>2+</sup>-Br<sup>-</sup> sample and the POF-Zn<sup>2+</sup>-Br<sup>-</sup> after catalysis cycles.

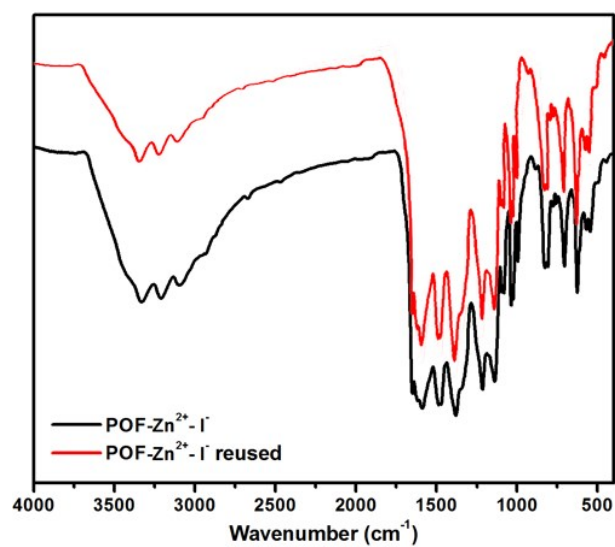

**Fig. S7** Comparison of IR spectra of the as-made POE-Zn<sup>2+</sup>-I<sup>-</sup> sample and the POE-Zn<sup>2+</sup>-I<sup>-</sup> after catalysis cycles.

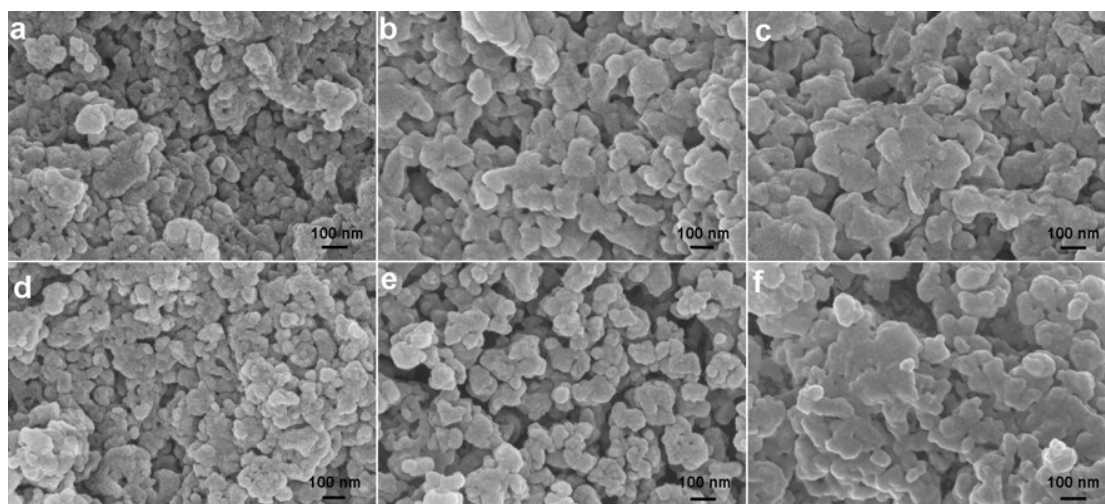

**Fig. S8** Comparison of SEM of the as-made POE-Zn<sup>2+</sup>-Cl<sup>-</sup>, POE-Zn<sup>2+</sup>-Br<sup>-</sup>, POE-Zn<sup>2+</sup>-I<sup>-</sup> (a-c) and the POE-Zn<sup>2+</sup>-Cl<sup>-</sup>, POE-Zn<sup>2+</sup>-Br<sup>-</sup>, POE-Zn<sup>2+</sup>-I<sup>-</sup> after catalysis cycles (d-f).

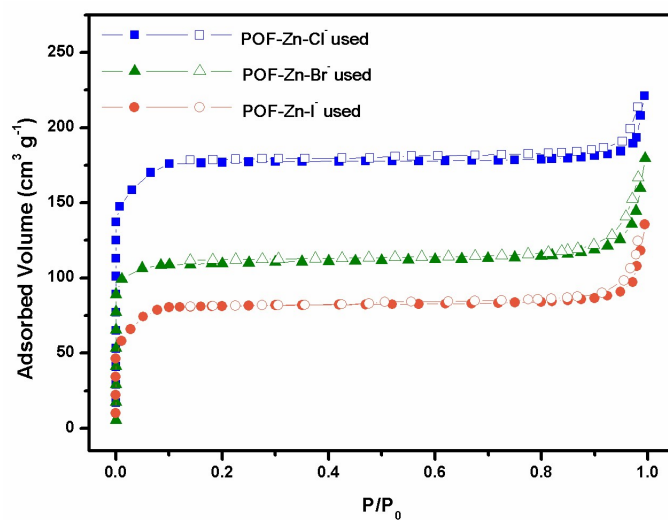

**Fig. S9**  $N_2$  adsorption/desorption isotherms of POF-DI, POF- $Zn^{2+}$ -Cl $^-$ , POF- $Zn^{2+}$ -Br $^-$  and POF- $Zn^{2+}$ -I $^-$  after catalysis cycles. BET surface areas of POF- $Zn^{2+}$ -Cl $^-$ , POF- $Zn^{2+}$ -Br $^-$  and POF- $Zn^{2+}$ -I $^-$  are  $494\text{ m}^2\text{g}^{-1}$ ,  $312\text{ m}^2\text{g}^{-1}$  and  $286\text{ m}^2\text{g}^{-1}$ .

**Table S2 A comparison table for the present POF-Zn catalysts**

| Entry | Catalyst               | Co-catalyst | Temperature ( $^{\circ}\text{C}$ ) | Pressure(MPa) | Yield (%) | Reference |
|-------|------------------------|-------------|------------------------------------|---------------|-----------|-----------|
| 1     | POF- $Zn^{2+}$ -I $^-$ | None        | 60                                 | 1             | 99        | This work |
| 2     | Zn/HAzo-POP-1          | TBAB        | 100                                | 3             | 98        | 1         |
| 3     | Bp-Zn@MA               | TBAB        | 100                                | 1             | 99        | 2         |
| 4     | P-POF-Zn               | TBAB        | 100                                | 1.5           | 99        | 3         |
| 5     | Zn@ah-PMF              | TBAB        | 100                                | 2             | 99        | 4         |
| 6     | PAF- $ZnBr_2$          | TBAB        | 90                                 | 1             | 95        | 5         |

### III Characterization Data of Catalytic Products

#### <sup>1</sup>H NMR Spectra of Catalytic Products

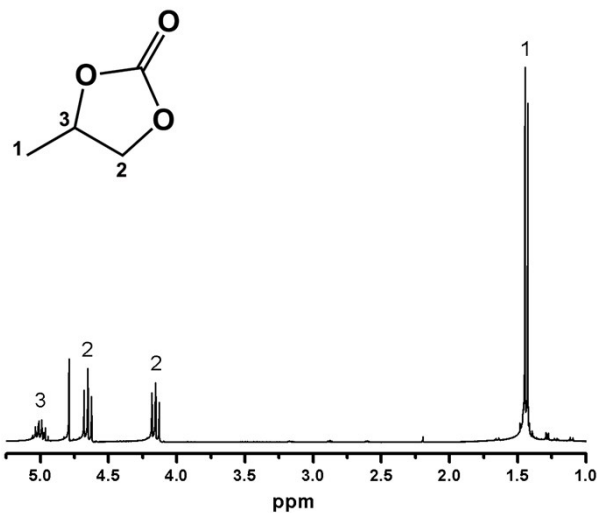

propylene carbonate (CD<sub>4</sub>O, 400 MHz)

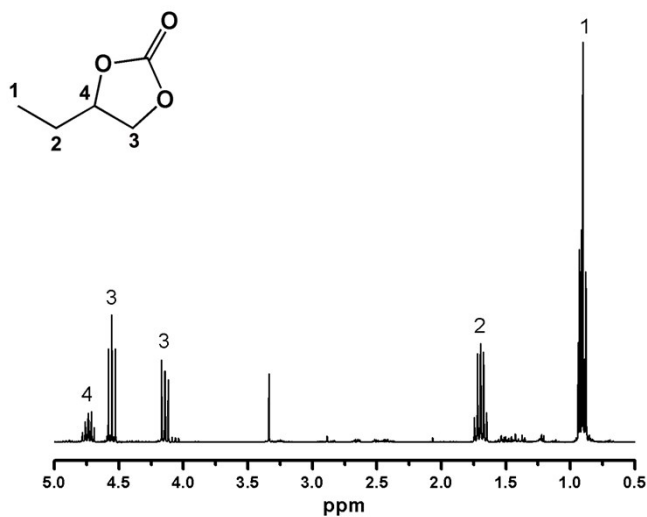

4-Ethyl-1,3-dioxolan-2-one (CD<sub>4</sub>O, 400 MHz)



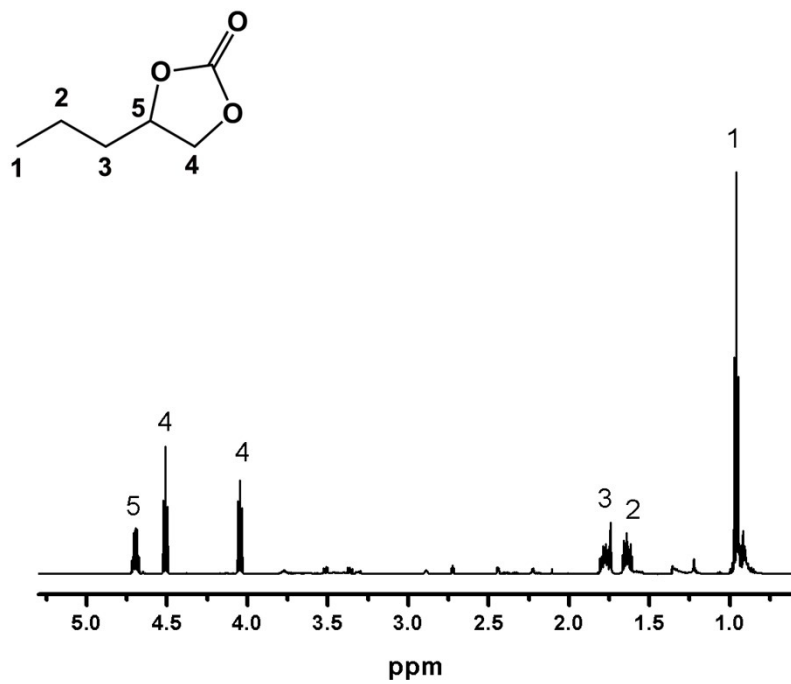

4-Propyl-1,3-dioxolan-2-one (CDCl<sub>3</sub>, 400 MHz)

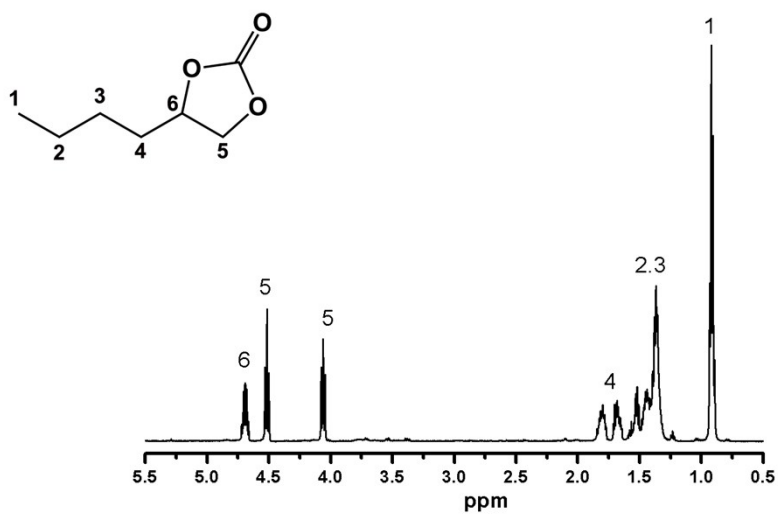

4-Butyl-1,3-dioxolan-2-one (CDCl<sub>3</sub>, 400 MHz)

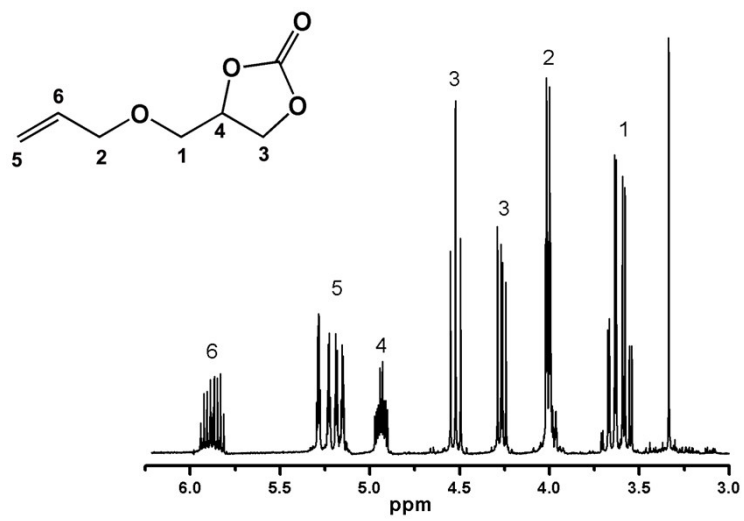

1,3-Dioxolan-2-one (CD<sub>4</sub>O, 400 MHz)

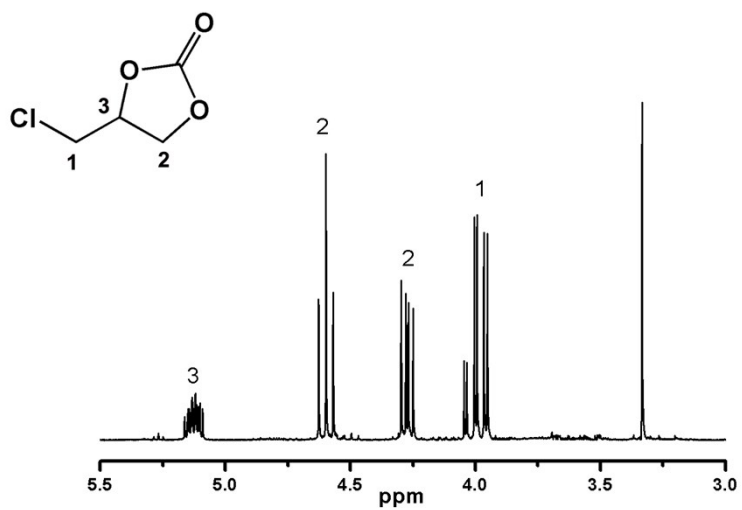

4-(chloromethyl)-1,3-dioxolan-2-one (CD<sub>4</sub>O, 400 MHz)

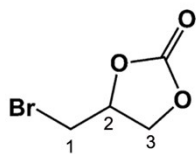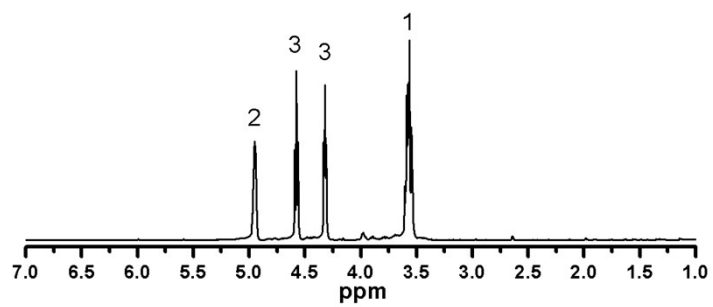

4-(Bromomethyl)-1,3-dioxolan-2-one (CDCl<sub>3</sub>, 400 MHz)

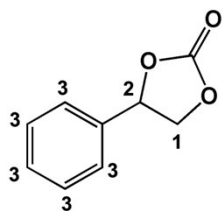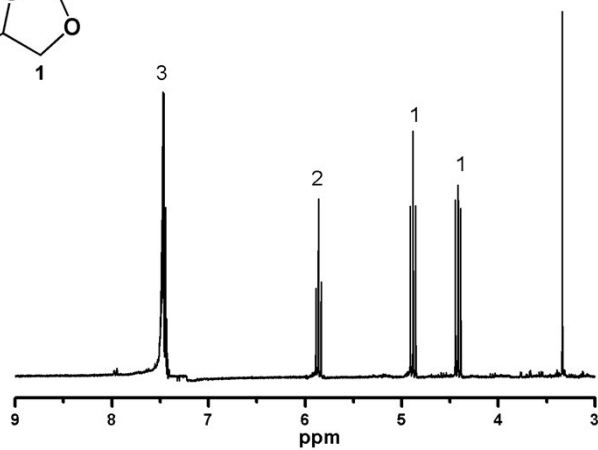

4-phenyl-1,3-dioxolan-2-one (CD<sub>4</sub>O, 400 MHz)

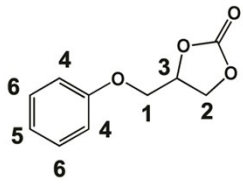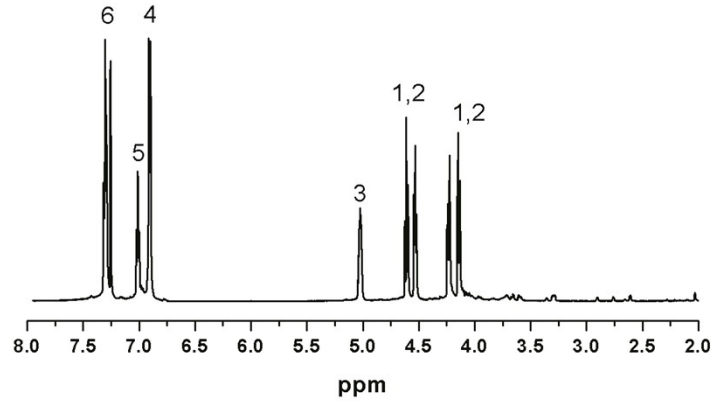

4-(phoxymethyl)-1,3-dioxolan-2-one (CDCl<sub>3</sub>, 400 MHz)

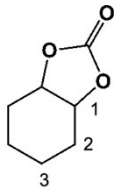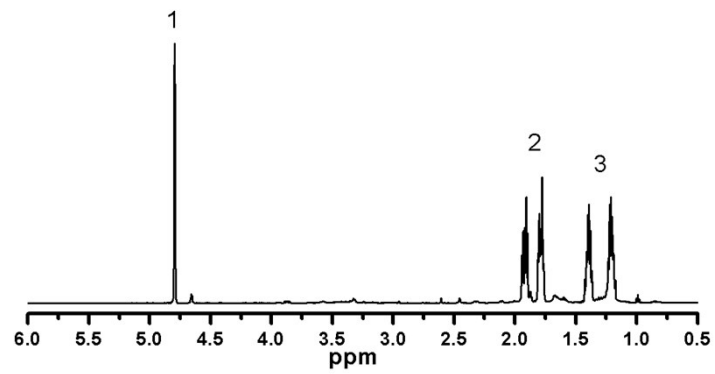

1,3-Benzodioxol-2-one (CDCl<sub>3</sub>, 400 MHz)

# GC-MS Analysis of Catalytic Products

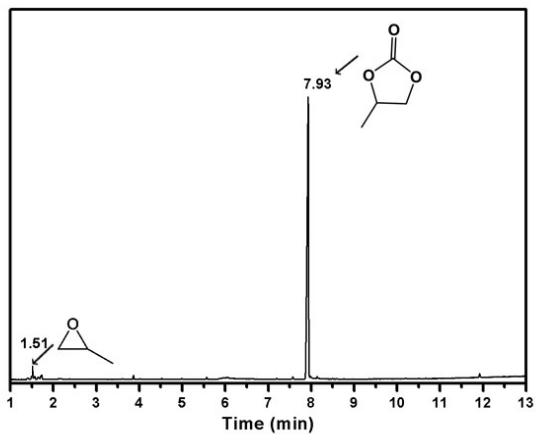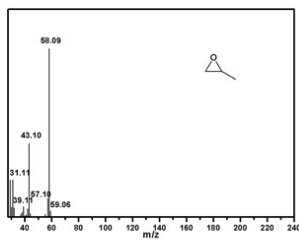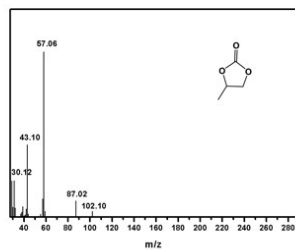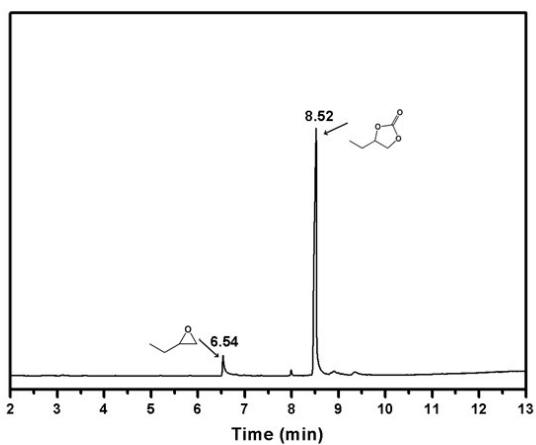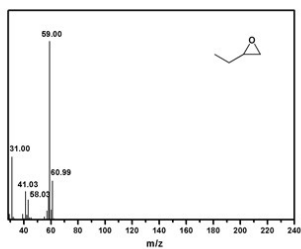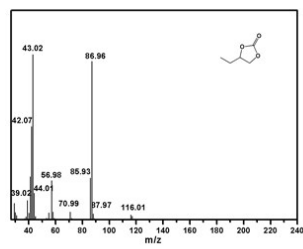

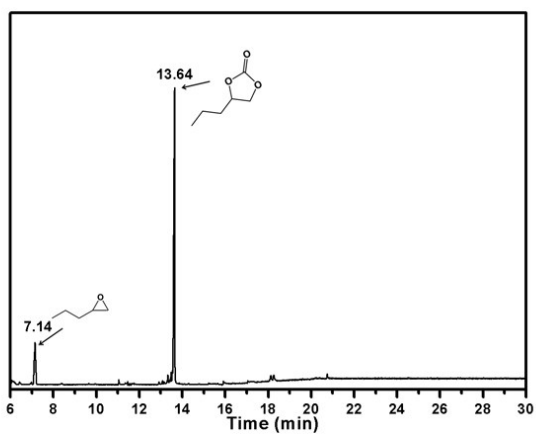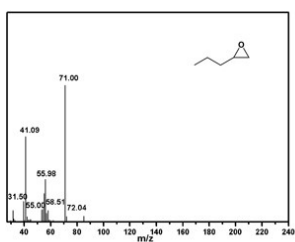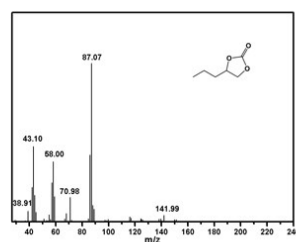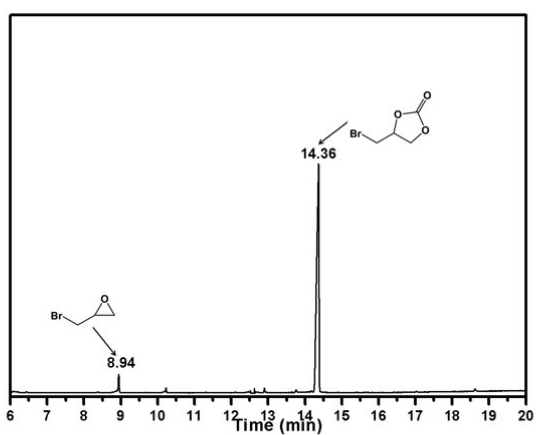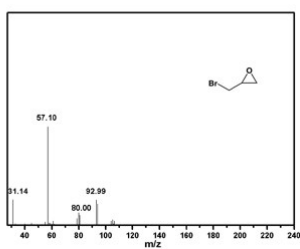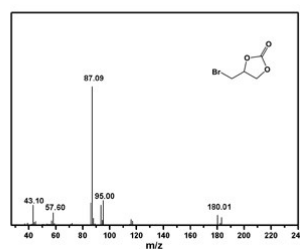

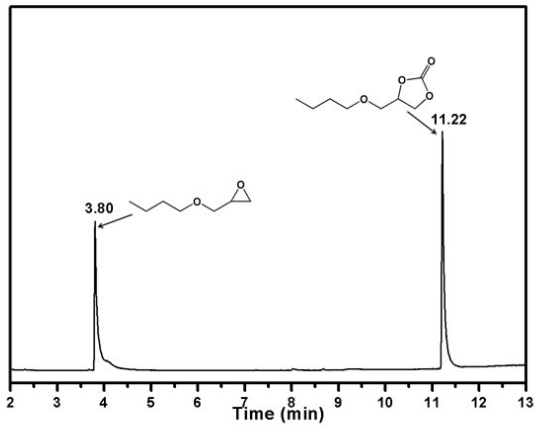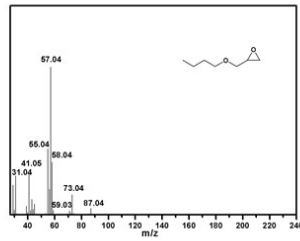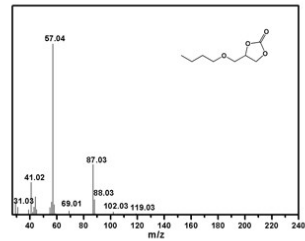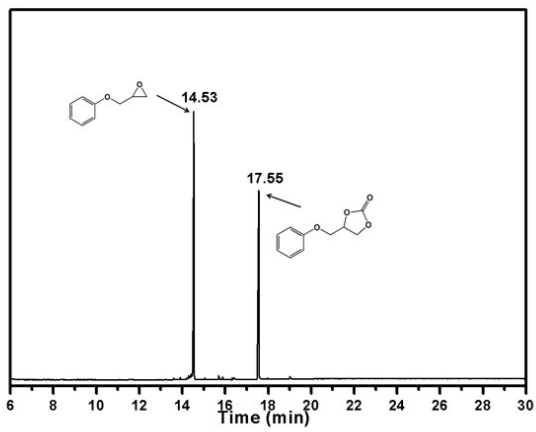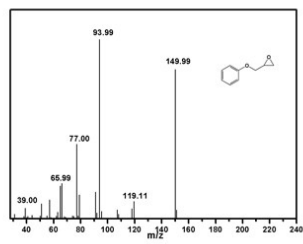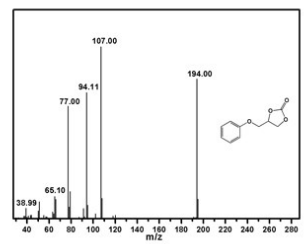

## References

1. G. Ji, Z. Yang, H. Zhang, Y. Zhao, B. Yu, Z. Ma and Z. Liu, *Angew. Chem. Int. Ed.*, 2016, **55**, 9685-9689.
2. J. Chen, H. Li, M. Zhong and Q. Yang, *Green Chem.*, 2016, **18**, 6493-6500.
3. J. Chen, M. Zhong, L. Tao, L. Liu, S. Jayakumar, C. Li, H. Li and Q. Yang, *Green Chem.*, 2018, **20**, 903-911.
4. J. Yin, T. Zhang, E. Schulman, D. Liu and J. Meng, *J. Mater. Chem. A*, 2018, **6**, 8441-8448.
5. J. Wang and Y. Zhang, *Green Chem.*, 2016, **18**, 5248-5253.
